# Supplementary material
Source: ML conference proceedings conference paper supplement (https://proceedings.mlr.press/v164/he22a.html)
Supplement: Supplementary file 2 [file he22a-supp.zip]

Archive with 3 entries (2 files):
- supplementary/
- supplementary/supplementary.pdf
- __MACOSX/supplementary/._supplementary.pdf
